# Supplementary material
Source: Copernicus journal article supplement (doi:10.5194/egusphere-2026-2836)
Supplement: Supplementary file 1 [file egusphere-2026-2836-supplement.pdf]

*Supplement of*

**High-resolution glacier mapping reveals inventory biases and terrain controls on debris cover in the Karakoram**

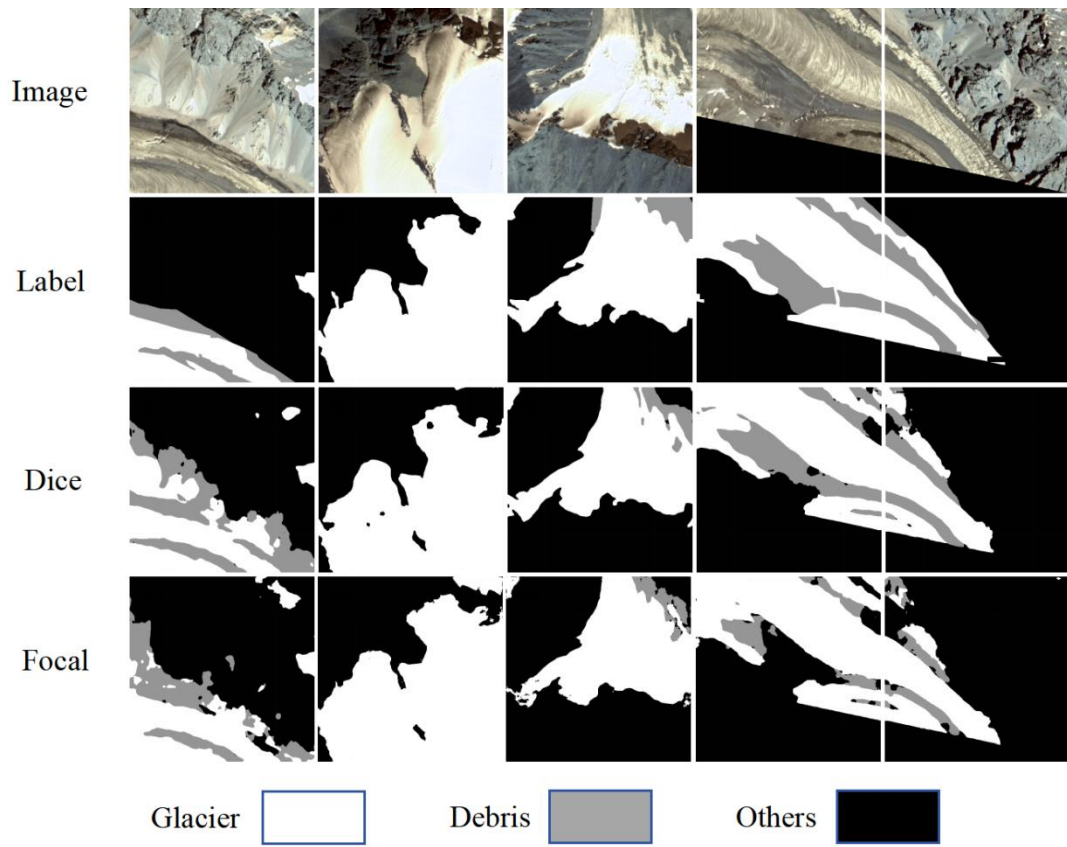

**Figure S1.** Comparison of extraction results in ZY-3 imagery for Dice loss function and Focal loss function.

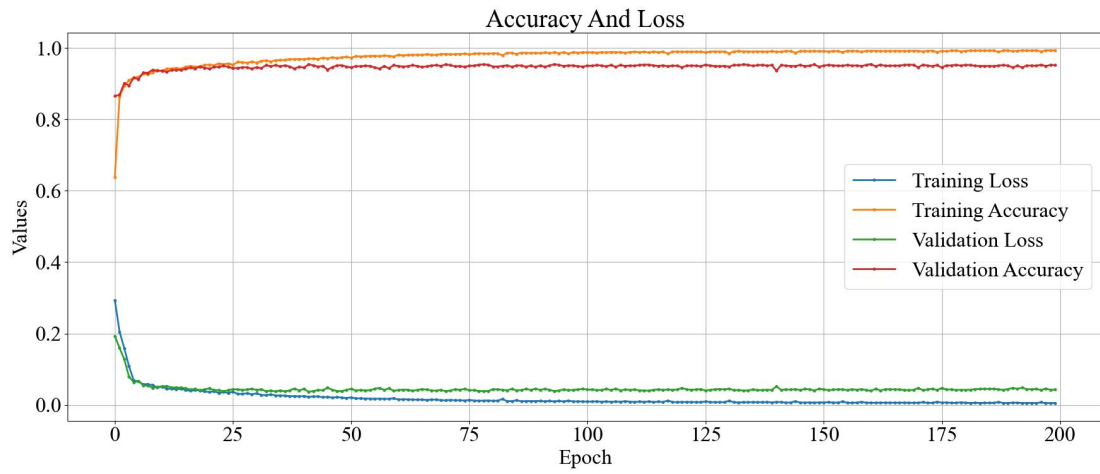

**Figure S2.** Variation of accuracy and loss values with epoch when training U-Net + CBAM using ZY-3 image data.

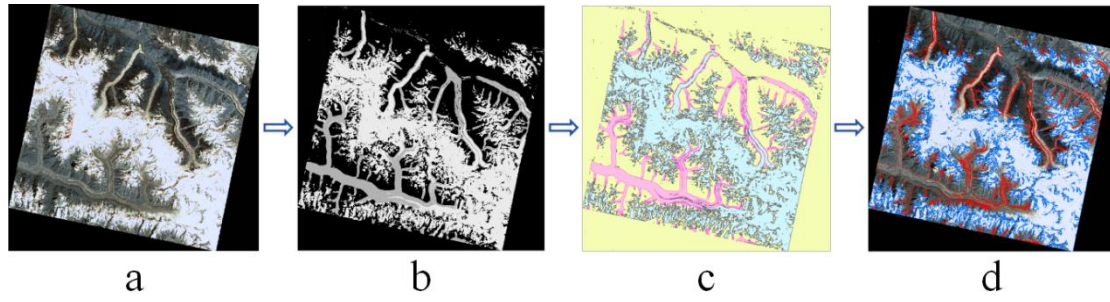

**Figure S3.** Processing flow for extracting glacier outlines using single-view ZY-3 imagery. **(a)** Single ZY-3 image. **(b)** Grayscale image of glacier boundaries extracted by the deep learning model. **(c)** Vectorised glacier extent. **(d)** Glacier boundaries after background removal.

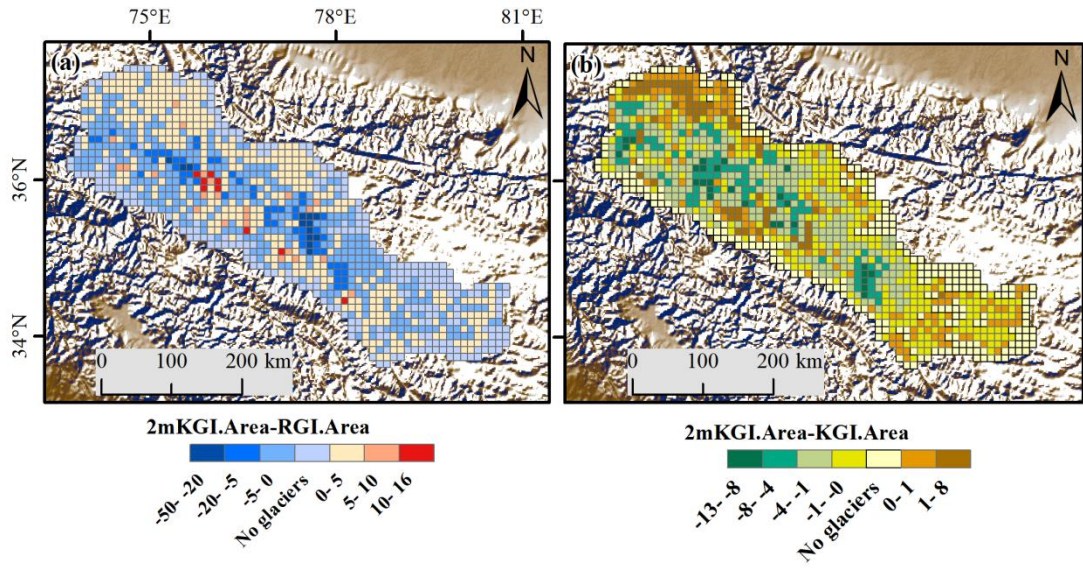

**Figure S4.** Grid-based (10 km × 10 km) comparison of glacier-area differences among inventories: **(a)** 2mKGI versus RGI in accumulation areas and **(b)** KGI-2020s versus 2mKGI.

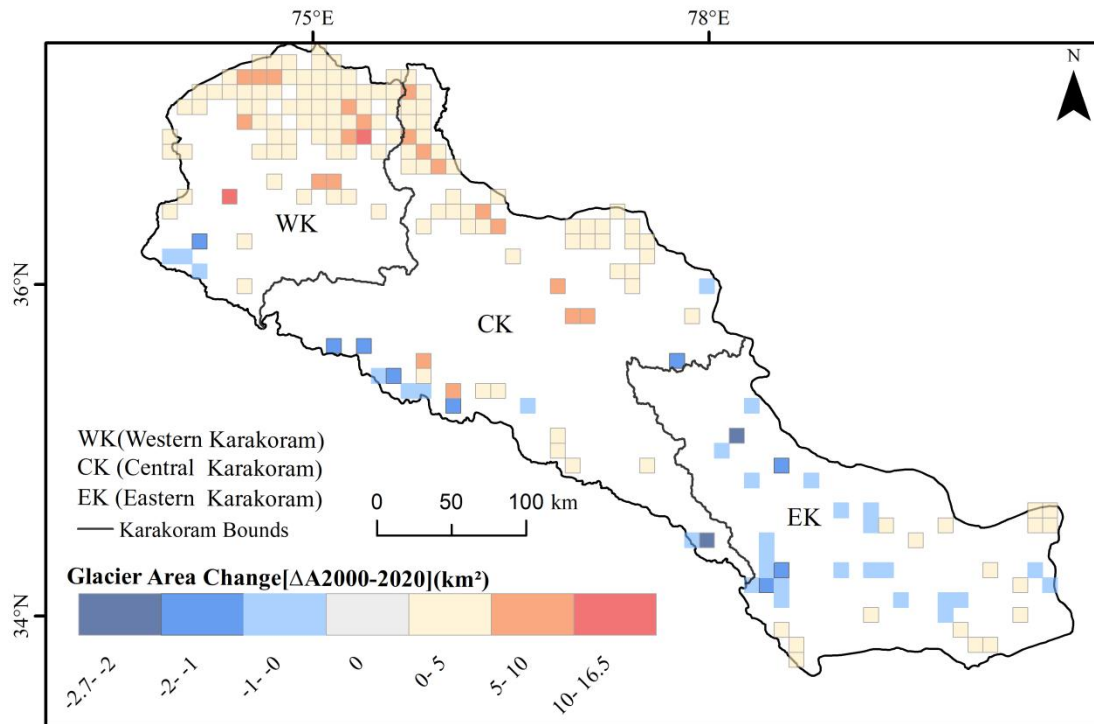

**Figure S5.** Inventory-based glacier-area differences between RGI v7.0 and 2mKGI after uncertainty filtering. Glacier area was aggregated to a 10 km × 10 km grid.

**Table S1.** Comparison of the recall for the various indicators in extracting glacier ice and supraglacial debris.

| Characteristic          | Ground Truth | Spectrum (%) | Spectrum + LST (%) | Spectrum + Slope (%) | Spectrum +LST + Slope (%) |
|-------------------------|--------------|--------------|--------------------|----------------------|---------------------------|
| Recall (glacier/debris) | 100          | 94.5/61.6    | 70.5/71.8          | 95.0/72.2            | 97.1/84.6                 |

**Table S2.** Summary of manual revision of the initially extracted glacier extents before glacier-unit subdivision.

| Source              | Initial area<br>(km <sup>2</sup> ) | Final area<br>(km <sup>2</sup> ) | Net area change<br>(km <sup>2</sup> ) | Net change<br>(%) |
|---------------------|------------------------------------|----------------------------------|---------------------------------------|-------------------|
| Clean-ice           | 19760.9                            | 19021.9                          | -739                                  | -3.7              |
| Supraglacial debris | 1953.1                             | 2239.9                           | 286.8                                 | 14.6              |

**Table S3.** Examples of glacier attribute information from the 2mKGI.

| Glacier_ID  | 1          | 2          | 3          |
|-------------|------------|------------|------------|
| Area        | 0.011311   | 0.030646   | 0.108303   |
| Longitude   | 74.492235  | 74.493569  | 74.502972  |
| Latitude    | 36.04248   | 36.045467  | 36.04537   |
| DEM_Min     | 3913       | 3708       | 4490       |
| DEM_Max     | 5619       | 6016       | 4853       |
| DEM_Range   | 1706       | 2308       | 363        |
| DEM_Median  | 4747       | 4601       | 4602       |
| DEM_Data    | ZY-3 DEM   | ZY-3 DEM   | ZY-3 DEM   |
| Slope_Min   | 6          | 0          | 0          |
| Slope_Max   | 89         | 89         | 89         |
| Slope_Range | 83         | 89         | 89         |
| Slope_Mean  | 56.933969  | 53.450026  | 33.277905  |
| Aspect_Mean | 178.011653 | 177.849817 | 176.217441 |
| Debris_Area | 0          | 0          | 0          |
| Aspect      | S          | S          | S          |
| Source      | ZY-3       | ZY-3       | ZY-3       |
| Surge       | NO         | NO         | NO         |
